# Supplementary material for: TEMPO: a novel chameleonic ligand for s-block metal amide chemistry
Source: Royal Society of Chemistry journal article supplement (doi:10.1039/b104937m), 2001-01-01
Supplement: b104937m.doc [file b104937m.doc]

### Supplementary Data

**Syntheses and Characterisation**

All reactions were performed in Schlenk tubes under an inert atmosphere of dry, oxygen-free argon gas. *n*-butyllithium and *n,sec*-dibutylmagnesium were purchased from Aldrich and standardised prior to each use using the diphenylacetic reagent indicator and xylene/*sec-*butanol with 1,10-phenanthroline indicator methods respectively. 1,1,1,3,3,3-hexamethyldisilazane was distilled from CaH2, degassed using a freeze-pump-thaw methodology and stored over 4A molecular sieves until required. Hexane was distilled from Na/benzophenone, degassed using the same methodology as before and stored over 4A molecular sieves. TEMPO and NaHMDS were purchased from Aldrich and used without further purification.

NMR spectral data were obtained using a Bruker DPX 400 spectrometer operating at 400.13 MHz for 1H. Chemical shifts are reported relative to TMS at 0.00ppm for 1H. However the spectra obtained are of limited use due to the paramagnetic nature of the samples examined, because of this only generalised assignments can be made for some signals. Microanalyses for the elements C, H, and N were performed on a Perkin-Elmer 240 elemental analyser. IR spectral data were obtained using a Nicolet Avatar 360 FTIR spectrometer, samples were prepared as Nujol mulls in an argon-filled glovebox, abbreviations used: s (strong) m (medium) w (weak) sh (shoulder) b (broad).

[{Mg(HMDS)(-TEMPO-)}2] **1**

4 mmol of HMDS were added to 2mmol of Bu2Mg in heptane to give a clear solution. To this solution was added 4mmol of TEMPO as a solution in 5ml of hexane resulting in the formation of a yellow solution which was stirred for 1h at ambient temperature. The solution was subsequently cooled to -20C in a freezer for 48h during which time a small crop of crystals of **1** were deposited.

Yield: <5% of first batch, filtrate not kept: optimisation currently in progress.

Mp: collapsed to an oil after a few hours standing.

1H NMR (400.13MHz in *d*6 DMSO at 300K- run on oil) 1.40/1.02 (s, anionic TEMPO), 1.07-0.85 (m, alkyl signals from hydrocarbon solvents), 0.01 (s, SiC*H3*). Anionic TEMPO resonances were verified by comparison with those in [(Li+TEMPO)4.2THF].

Attempts to repeat the preparation of **1** have so far yielded only oily products. However all the samples analysed contain anionic TEMPO and HMDS signals.

[{Li(-HMDS).TEMPO}2] **2**

2mmol of crystalline LiHMDS was dissolved in 5ml of hexane in a Schlenk tube at ambient temperature to give a clear solution. A hexane solution of TEMPO was then produced by dissolving 2mmol of solid TEMPO in 5ml of hexane. This vivid orange solution was added dropwise to the LiHMDS solution resulting in the formation of a pale orange suspension. Gentle heating of this suspension resulted in complete dissolution. The solution was surrounded by a hot-water Dewar flask and allowed to cool to ambient temperature. After 24h a large crop of orange crystals of **2** were deposited.

Yield: 72%

Mp: 138C

1H NMR (400.13MHz in *d*6 benzene at 300K) 2.53 (Extremely broad signal, TEMPO -C*H*3), 1.36 (Broad signal C*H*2), 1.24 (Broad signal C*H*2), 0.89 (broad signal C*H*2), 0.10 (s, Sharp signal SiC*H*3).

Infra red (Nujol mull, cm-1)

2960 s/br 2860 s/br 1658 w

1462 s/br 1397 w 1376 s

1365 m/sh 1348 m 1296 w

1249 s 1238 s 1200 w

1170 w 1127 m 1088 w

1021 s/br/sh 976 m 957 w

934 w 875 w 826 s/br/sh

760 m/sh 742 s/br/sh 686 w

656 m/br 633 w 605 w

1. m/br

## Possible diagnostic bands include 1376cm-1, 1170cm-1 and 826cm-1 {C(Me)2},1248cm-1 (Si-Me), 975 cm-1 and 957 cm-1 (possible N-O), 935 cm-1 (Si-N-Si), 760cm-1 (SiMe3), a large number of the signals also fall within the regions of the various piperidine ring deformations. Upon exposure to air new bands appeared at 3672cm-1 (LiOH) and 3400cm-1 (Si2NH).

[{Li2(-HMDS)(-TEMPO).2TEMPO}+{Mg(HMDS)3}-] **3**

A 1:1 mixture of crystalline Mg(HMDS)2 and **2** (2mmol of each) was placed in a Schlenk tube and dissolved in a warm hexane solution. The solution was surrounded with a hot water Dewar flask and allowed to cool to ambient temperature. After 24h a small crop of orange-yellow crystals of **3** were deposited.

Yield: 17% of first batch, filtrate not kept: optimisation currently in progress.

Mp: 126-128C

1H NMR (400.13MHz in *d*6 benzene at 300K) 1.69 (Very Broad TEMPO C*H*3), 1.37(s, TEMPO), 1.25 (d, TEMPO), 1.07 (s, SiC*H*3), 0.82 (broad, TEMPO), 0.64 (s, TEMPO), 0.47 (s, unreacted Mg(HMDS)2), 0.33 (s, unreacted Mg(HMDS)2), 0.29 (s, Li2Mg2(HMDS)4(O)), 0.10 (s, SiC*H*3).

Infra red (Nujol mull, cm-1)

2970 s/br 2870 s/br 1456 s/br

1403 w 1376 s/sh 1350 m

1298 w 1236 s/br/sh 1194 w

1174 m/br 1130 m 1087 w

1060 w 1005 s/br 976 m

956 w 930 m 877 s

830 s/br 778 m 751 m

720 m 660 m/br 617 w

606 m 577 w 583 w

## Possible diagnostic bands include 1376cm-1, 1174cm-1 and 830cm-1 {C(Me)2},1298cm-1 (Si-Me), 976 cm-1 and 956cm-1 (possible N-O), 930cm-1 (Si-N-Si), 751cm-1 (SiMe3), a large number of the signals also fall within the regions of the various piperidine ring deformations. Upon exposure to air new signals were observed at 3696cm-1 {Mg(OH)2}, 3675cm-1 (LiOH) and 3375cm-1 (Si2NH).

[{Na(-HMDS).TEMPO}2] **4**

2mmol of solid NaHMDS was dissolved in 5ml of hexane in a Schlenk tube at ambient temperature to give a clear solution. A hexane solution of TEMPO was produced by dissolving 2mmol of solid TEMPO in 5ml of hexane. This vivid orange solution was then added dropwise to the NaHMDS solution resulting in the formation of a pale orange suspension. Gentle heating of this suspension resulted in complete dissolution. The solution was subsequently cooled to -20C in a freezer, over a period of 48h a small crop of orange crystals of **4** were deposited.

Yield: 22% of first batch, filtrate not kept: optimisation currently in progress.

Mp: 95-97C

1H NMR (400.13MHz in *d*6 benzene at 300K) 0.87 (Very broad signal, TEMPO), 0.098 (s, SiC*H*3)

Infra red (Nujol mull, cm-1)

2970 s/br 2870 s/br 1606 m

1560 w/br 1461 s/br 1396 w

1374 s/sh 1348 m 1294 w/br/sh

1197 w 1170 w 1129 m

1059 s/br 1005 m/sh 973 m

954 w 930 w/sh 876 s

819 s/br 741 s/sh 652 m

1. m

## Possible diagnostic bands include 1396cm-1, 1374cm-1, 1170cm-1 and 819cm-1 {C(Me)2},1294cm-1 (Si-Me), 973 cm-1 and 954cm-1 (possible N-O), 935cm-1 (Si-N-Si), 741cm-1 (SiMe3), a large number of the signals also fall within the regions of the various piperidine ring deformations. Upon exposure to air a new signal appeared at 3645cm-1 (NaOH) no Si2NH signal was observed due to the presence of a large hydrolysis peak.

[(Li.4TEMPO)+{Zn(HMDS)3}-] **5**

2mmol of impure liquid Zn(HMDS)2 (LiHMDS present as an impurity) was placed in a Schlenk tube and dissolved in 5ml of hexane. A hexane solution of TEMPO was produced by dissolving 2mmol of solid TEMPO in 5ml of hexane. This vivid orange solution was then added dropwise to the Zn(HMDS)2 solution resulting in the formation of a red-orange suspension which was re-dissolved with gentle heating. The solution was surrounded by a hot water Dewar flask and allowed to cool to ambient temperature. After 24h a small crop of colourless crystals of **5** were deposited.

Yield: <5% of first batch, filtrate not kept.

Mp: 112-114C

1H NMR: 1.49/1.38/0.80 (broad overlapping TEMPO resonances), 0.34/0.20/0.10 (s, SiC*H*3).

The reaction was repeated using stoichiometric ratios of 1LiHMDS : 1 Zn(HMDS)2 : 2 or 4 TEMPO. This led to a substantial increase in the yield of solid product (77% based on the formula of **5**); however X-ray analyses of several samples revealed a mixture of **5** and **2**. Free TEMPO also appeared to be present. Thus far it has not proved possible to separate this mixture.

Satisfactory elemental analysis was obtained for **2**, **3** and **4** although each sample was observed to lose weight rapidly during the procedure.
